# Supplementary material for: Triglyceride Glucose-Waist Circumference Better Predicts Coronary Calcium Progression Compared with Other Indices of Insulin Resistance: A Longitudinal Observational Study
Source: PubMed Central journal article supplement (PMC7795085; doi:10.3390/jcm10010092), 2020-12-29
Supplement: jcm-10-00092-s001.pdf [file jcm-10-00092-s001.pdf]

## Supplementary materials

**Table S1.** Baseline clinical and biochemical characteristics according to the CAC score in the whole cohort ( $n = 3997$ ).

|                                      | Total         | No CAC        | CAC           | <i>p</i> |
|--------------------------------------|---------------|---------------|---------------|----------|
| <i>n</i> (%)                         | 3997          | 2649 (66.2)   | 1348 (33.7)   |          |
| Age (years)                          | 53.2 ± 8.1    | 51.3 ± 7.5    | 56.9 ± 8.0    | <0.001   |
| Sex (male, %)                        | 75.5          | 69.0          | 88.2          | <0.001   |
| Body mass index (kg/m <sup>2</sup> ) | 24.7 ± 3.0    | 24.5 ± 2.9    | 25.3 ± 3.0    | <0.001   |
| Waist circumference (cm)             | 86.2 ± 8.2    | 85.2 ± 8.3    | 88.4 ± 7.7    | <0.001   |
| Systolic BP (mmHg)                   | 119.9 ± 13.0  | 118.3 ± 12.7  | 123.2 ± 13.1  | <0.001   |
| Diastolic BP (mmHg)                  | 76.8 ± 10.4   | 75.6 ± 10.4   | 79.2 ± 9.9    | <0.001   |
| Current smoker (%)                   | 27.7          | 26.3          | 30.2          | 0.012    |
| Moderate drinker (%)                 | 50.4          | 47.3          | 56.5          | <0.001   |
| Physically active (%)                | 43.6          | 39.9          | 50.9          | <0.001   |
| Family history of diabetes (%)       | 24.1          | 24.0          | 24.4          | 0.784    |
| Diabetes (%)                         | 12.6          | 9.0           | 19.5          | 0.001    |
| Hypertension (%)                     | 31.0          | 23.8          | 45.2          | <0.001   |
| FPG (mg/dL)                          | 104.5 ± 20.8  | 102.3 ± 18.5  | 108.8 ± 24.1  | <0.001   |
| HbA1c (%)                            | 5.7 ± 0.8     | 5.6 ± 0.7     | 5.9 ± 0.9     | <0.001   |
| HbA1c (mmol/mol)                     | 38.7 ± 8.5    | 37.7 ± 7.6    | 40.6 ± 9.9    | <0.001   |
| Total cholesterol (mg/dL)            | 198.0 ± 32.9  | 197.2 ± 32.3  | 199.5 ± 34.0  | 0.045    |
| TG (mg/dL)                           | 135.2 ± 82.5  | 130.3 ± 81.2  | 145.0 ± 84.6  | <0.001   |
| LDL-C (mg/dL)                        | 124.4 ± 28.8  | 123.3 ± 28.1  | 126.5 ± 29.9  | 0.001    |
| HDL-C (mg/dL)                        | 52.6 ± 13.2   | 53.7 ± 13.7   | 50.5 ± 12.1   | <0.001   |
| Uric acid (mg/dL)                    | 5.7 ± 1.4     | 5.6 ± 1.4     | 5.9 ± 1.4     | <0.001   |
| AST (U/L)                            | 25 (21–31)    | 25 (21–31)    | 26 (22–32)    | <0.001   |
| ALT (U/L)                            | 22 (17–31)    | 21 (16–31)    | 24 (18–32)    | <0.001   |
| GGT (U/L)                            | 23 (15–39)    | 21 (14–37)    | 27 (18–42)    | <0.001   |
| hsCRP (mg/L)                         | 0.6 (0.3–1.2) | 0.5 (0.3–1.1) | 0.6 (0.3–1.2) | <0.001   |
| HOMA-IR                              | 2.2 ± 2.2     | 2.0 ± 1.3     | 2.5 ± 3.3     | <0.001   |
| TyG index                            | 8.7 ± 0.6     | 8.7 ± 0.6     | 8.8 ± 0.6     | <0.001   |
| TyG-BMI                              | 216.1 ± 33.4  | 212.3 ± 33.1  | 223.5 ± 32.7  | <0.001   |
| TyG-WC                               | 753.1 ± 100.9 | 738.8 ± 101.5 | 781.0 ± 93.8  | <0.001   |
| Baseline CAC score                   | 0 (0–10)      | 0 (0–1)       | 33 (9–110)    | <0.001   |

BP, blood pressure; FPG, fasting plasma glucose; HbA1c, hemoglobin A1c; TG, triglyceride; LDL-C, low-density lipoprotein cholesterol; HDL-C, high-density lipoprotein cholesterol; AST, aspartate aminotransferase; ALT, alanine aminotransferase; GGT, gamma-glutamyl transferase; hsCRP, high-sensitivity C-reactive protein; CAC, coronary artery calcification; *p* value showed comparison between the subjects with CAC and without CAC. Continuous variables with normal distributions are expressed as the mean ± standard deviation, whereas continuous variables with skewed distributions are expressed as the median (and interquartile range). Categorical variables are expressed as the percentage. The characteristics were compared using Student's *t* test for normally distributed continuous variables or Mann-Whitney *U* test for not normally distributed continuous variables, and the chi-squared test for categorical variables.

**Table S2.** The presence of CAC at baseline according to the quartiles of each parameter in the whole cohort ( $n = 3997$ ).

| Parameter    | $n$  | OR (95% CI)      |                  |                  |
|--------------|------|------------------|------------------|------------------|
|              |      | Unadjusted       | Model 1          | Model 2          |
| HOMA-IR      |      |                  |                  |                  |
| 1st quartile | 1002 | 1.00 (Ref)       | 1.00 (Ref)       | 1.00 (Ref)       |
| 2nd quartile | 999  | 1.14 (0.94–1.40) | 1.14 (0.93–1.41) | 1.08 (0.87–1.35) |
| 3rd quartile | 999  | 1.32 (1.09–1.59) | 1.24 (1.01–1.52) | 1.12 (0.90–1.40) |
| 4th quartile | 997  | 1.71 (1.42–2.05) | 1.58 (1.29–1.94) | 1.40 (1.12–1.75) |
| TyG          |      |                  |                  |                  |
| 1st quartile | 998  | 1.00 (Ref)       | 1.00 (Ref)       | 1.00 (Ref)       |
| 2nd quartile | 1000 | 1.60 (1.31–1.95) | 1.35 (1.08–1.68) | 1.23 (1.01–1.34) |
| 3rd quartile | 998  | 1.96 (1.62–2.38) | 1.65 (1.33–2.05) | 1.40 (1.10–1.78) |
| 4th quartile | 999  | 2.37 (1.96–2.88) | 2.12 (1.71–2.63) | 1.79 (1.39–2.31) |
| TyG-BMI      |      |                  |                  |                  |
| 1st quartile | 999  | 1.00 (Ref)       | 1.00 (Ref)       | 1.00 (Ref)       |
| 2nd quartile | 999  | 1.82 (1.49–2.22) | 1.38 (1.11–1.72) | 1.23 (0.97–1.56) |
| 3rd quartile | 1000 | 2.17 (1.78–2.65) | 1.60 (1.28–2.00) | 1.37 (1.07–1.76) |
| 4th quartile | 997  | 2.63 (2.16–3.20) | 2.33 (1.87–2.91) | 1.89 (1.46–2.44) |
| TyG-WC       |      |                  |                  |                  |
| 1st quartile | 999  | 1.00 (Ref)       | 1.00 (Ref)       | 1.00 (Ref)       |
| 2nd quartile | 1001 | 2.10 (1.71–2.58) | 1.45 (1.15–1.82) | 1.23 (0.96–1.58) |
| 3rd quartile | 1002 | 2.61 (2.13–3.19) | 1.65 (1.32–2.07) | 1.39 (1.07–1.80) |
| 4th quartile | 995  | 3.40 (2.78–4.16) | 2.38 (1.90–2.99) | 1.91 (1.45–2.50) |

Model 1 was adjusted for age and sex. Model 2 was adjusted for the variables included in model 1, plus systolic BP, LDL-cholesterol, HDL-cholesterol, smoking, drinking, and exercise habits. Logistic regression analysis was performed to calculate the odds ratios (ORs) and 95% confidence intervals (CIs) of the subgroups for the prediction of CAC progression.

**Table S3.** Areas under the receiver operating characteristic curves of each parameter for CAC in the whole cohort ( $n = 3997$ ).

| Parameter           | AUC            | Standard error |
|---------------------|----------------|----------------|
| HOMA-IR             | 0.564          | 0.0096         |
| TyG                 | 0.592          | 0.0093         |
| TyG-BMI             | 0.599          | 0.0092         |
| TyG-WC              | 0.622          | 0.0091         |
| Comparison *        | Difference AUC | $p$ -Value *   |
| TyG-WC vs. HOMA-IR  | 0.058          | < 0.001        |
| TyG-WC vs. TyG      | 0.030          | < 0.001        |
| TyG-WC vs. TyG-BMI  | 0.023          | < 0.001        |
| TyG-BMI vs. HOMA-IR | 0.040          | < 0.001        |
| TyG-BMI vs. TyG     | 0.007          | 1.000          |
| TyG vs. HOMA-IR     | 0.014          | 0.028          |

The difference of prediction performance between the parameters were presented the ROC curve (AUC) between the models. \* Comparisons were adjusted for multiple comparisons using Bonferroni correction. AUC=area under receiver operating characteristic (ROC) curves; CI=confidence interval.

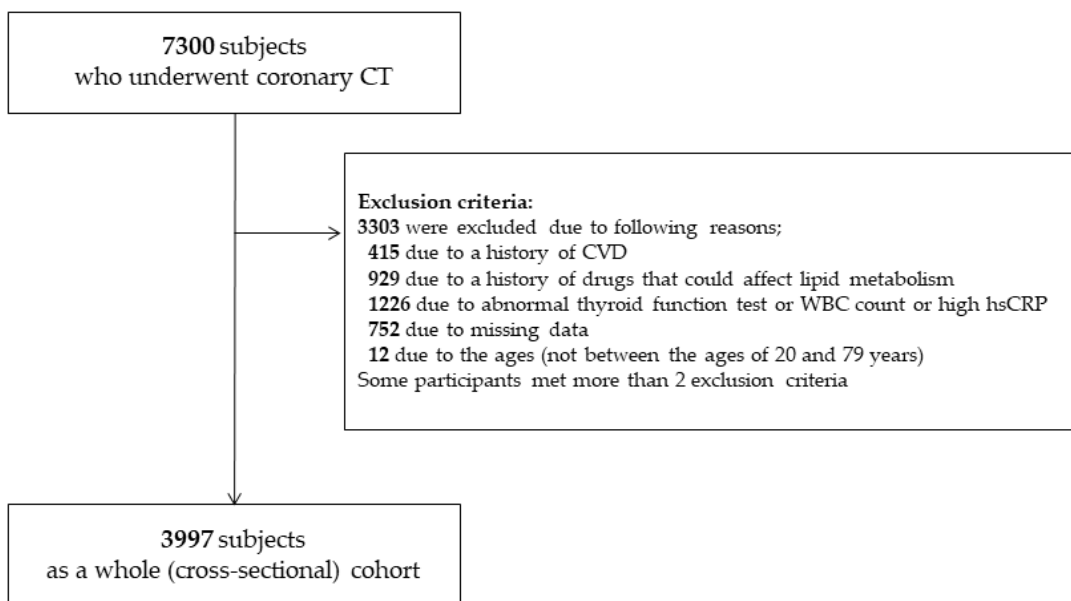

**Figure S1.** Study population included in cross-sectional analyses. CVD, cardiovascular disease; hsCRP, high-sensitive C-reactive protein.

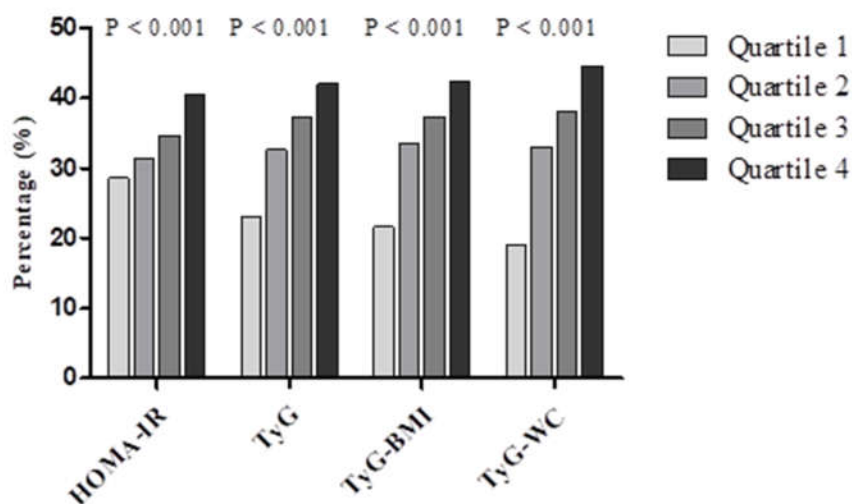

**Figure S2.** Proportion of the presence of CAC at baseline according to the quartiles of HOMA-IR, TyG, TyG-BMI, and TyG-WC in the whole cohort ( $n = 3997$ ). The proportion of progressors was compared using the chi-squared test.

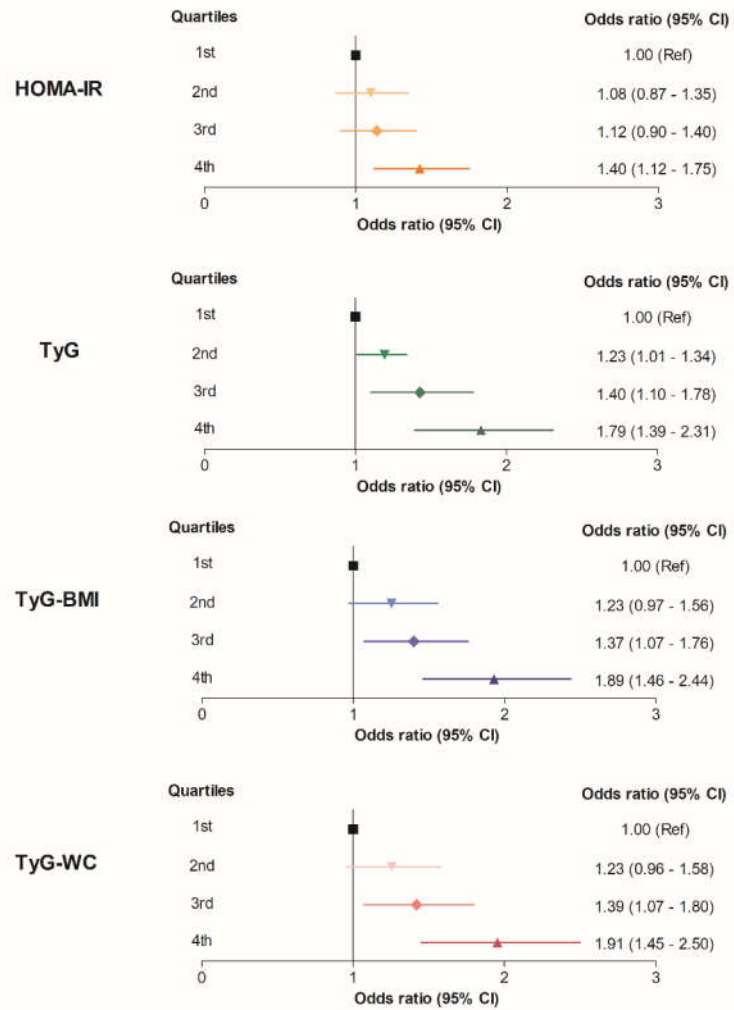

**Figure S3.** Summarized figure for the presence of CAC according to the quartiles of each parameter in the whole cohort ( $n = 3997$ ). The ORs (95% CIs) are adjusted for age, sex, systolic BP, LDL-cholesterol, HDL-cholesterol, smoking, drinking, and exercise habits.

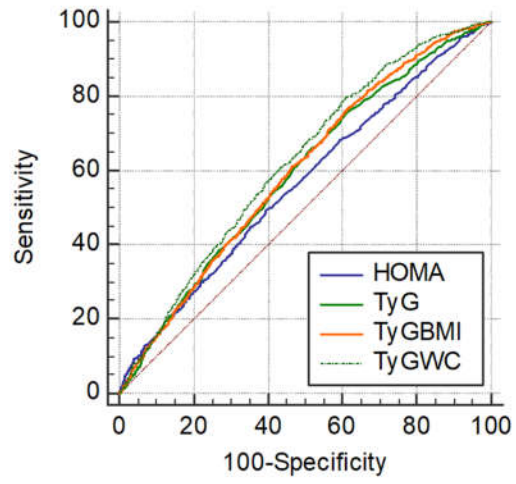

**Figure S4.** Receiver operating characteristic (ROC) curve of metabolic parameters for the presence of CAC in the whole cohort ( $n = 3997$ ).
